# Supplementary material
Source: PubMed Central journal article supplement (PMC6055194)
Supplement: pnas.1808351115.sapp.pdf [file pnas.1808351115.sapp.pdf]

Supporting Information Appendix for:

A novel aryl-homoserine lactone quorum-sensing signal produced by a dimorphic prosthecate bacterium

By Lisheng Liao, Amy L. Schaefer, Bruna Coutinho, Pamela J. B. Brown and E. Peter Greenberg

**Supplemental Table S1.** Uniprot and organism identifiers, synthesized signals and substrate preference for acyl-HSL synthases in Figure 1A

| Uniprot id       | Organism                                     | Protein name | Acyl-HSL signal | CoA or ACP <sup>a</sup> |
|------------------|----------------------------------------------|--------------|-----------------|-------------------------|
| A0A0P6VH04_9RHIZ | <i>Prostechomicrobium hirschii</i> 16        | HirI         | PA-HSL          | CoA                     |
| Q6NCZ6_RHOPA     | <i>Rhodopseudomonas palustris</i> CGA009     | Rpal         | pC-HSL          | CoA                     |
| A4YLT1_BRASO     | <i>Bradyrhizobium</i> sp. ORS278             | CinI         | Cinn-HSL        | CoA                     |
| C5B506_METEA     | <i>Methylobacterium extorquens</i> AM1       | Msal         | C8-HSL          | CoA                     |
| Q07P70_RHOPA     | <i>Rhodopseudomonas</i> sp. BisA53           |              | IV-HSL          | CoA                     |
| BJAI_BRADU       | <i>Bradyrhizobium japonicum</i> USDA 100     | Bjal         | IV-HSL          | CoA                     |
| RHLI_PSEAE       | <i>Pseudomonas aeruginosa</i> PAO1           | RhII         | C4-HSL          | ACP                     |
| A6V1U9_PSEEA7    | <i>Pseudomonas aeruginosa</i> PA7            | RhII         | C4-HSL          | ACP                     |
| Q939D0_PSECL     | <i>Pseudomonas chloroaphis (aerofaciens)</i> | Csal         | C4-HSL          | ACP                     |
| PHZI_PSEFL       | <i>Pseudomonas fluorescens</i>               | PhzI         | 3OHC6-HSL       | ACP                     |
| A0A0H3HXG1_BURPE | <i>Burkholderia pseudomallei</i> 1026b       | Bpml1        | C8-HSL          | ACP                     |
| Q4VSJ8_BURGL     | <i>Burkholderia glumae</i>                   | TofI         | C8-HSL          | ACP                     |
| A0A0H2WCK4_BMAI1 | <i>Burkholderia mallei</i> ATCC 23344        | Bmal1        | C8-HSL          | ACP                     |
| A0ZSH0_SHEH      | <i>Shewanella (Alteromonas) hanedai</i>      |              |                 | ACP                     |
| LUXI_ALIFS       | <i>Aliivibrio (Vibrio) fischeri</i>          | LuxI         | 3oxoC6-HSL      | ACP                     |
| A6CUQ4_9VIBR     | <i>Vibrio shilonii</i> AK1                   |              |                 | ACP                     |
| A0A0Q2RV31_VIBR  | <i>Vibrio furnissii</i>                      |              |                 | ACP                     |
| B2JQL0_PARP8     | <i>Paraburkholderia phymatum</i>             |              |                 | ACP                     |
| D9SG23_GALCS     | <i>Gallionella capsiferriformans</i> ES-2    |              |                 | ACP                     |
| LASI_PSEAE       | <i>Pseudomonas aeruginosa</i> PAO1           | LasI         | 3oxoC12-HSL     | ACP                     |
| Q6ITU1_PSEFL     | <i>Pseudomonas fluorescens</i>               |              |                 | ACP                     |
| E6VLG8_RHOPX     | <i>Rhodopseudomonas palustris</i> DX-1       |              |                 | ACP                     |
| G7D671_BRAJP     | <i>Bradyrhizobium japonicum</i> USDA 6       |              |                 | ACP                     |
| Q93UW5_RHIRD     | <i>Rhizobium radiobacter</i>                 |              |                 | ACP                     |
| F7XZ38_RHIFR     | <i>Sinorhizobium fredii</i> GR64             |              |                 | ACP                     |
| TRAI_AGRFC       | <i>Agrobacterium tumefaciens</i> C58         | Tral         | 3oxoC8-HSL      | ACP                     |
| H0HH08_RHIRD     | <i>Agrobacterium tumefaciens</i> 5A          |              |                 | ACP                     |
| EAGI_ENTAG       | <i>Enterobacter (Pantoea) agglomerans</i>    | Eagl         | 3oxoC6-HSL      | ACP                     |
| Q7CGP3_YERPE     | <i>Yersinia pestis</i>                       | Yspl         | 3oxoC6-HSL      | ACP                     |
| ESAI_PANSE       | <i>Pantoea (Erwinia) stewartii</i>           | Esal         | 3oxoC6-HSL      | ACP                     |
| YENI_YEREN       | <i>Yersinia enterocolitica</i>               | YenI         | C6-HSL          | ACP                     |
| SWRI_SERLI       | <i>Serratia liquefaciens</i>                 | SwrI         | C4-HSL          | ACP                     |
| CARI_PECCC       | <i>Pectobacterium (Erwinia) carotovorum</i>  | Carl         | 3oxoC6-HSL      | ACP                     |
| ECHI_DICCH       | <i>Dickeya (Erwinia) chrysanthemi</i>        | EchI         | 3oxoC6-HSL      | ACP                     |

<sup>a</sup>Known or predicted acyl substrate

**Supplemental Table S2. Bacterial strains and plasmids**

| Strain, plasmid, or primer sequence | Relevant characteristic(s)                                                                                                                              | Source    |
|-------------------------------------|---------------------------------------------------------------------------------------------------------------------------------------------------------|-----------|
| <u>Strains</u>                      |                                                                                                                                                         |           |
| <i>P. hirschii</i> 16               | Wild-type isolated from freshwater (ATCC 27832T)                                                                                                        | (1, 2)    |
| <i>P. putida</i>                    |                                                                                                                                                         |           |
| F1                                  | Wild-type isolated from polluted creek                                                                                                                  | (3)       |
| RLF1                                | $\Delta$ <i>paaF</i> phenylacetyl-CoA ligase (locus tag Pput_2480)                                                                                      | (4)       |
| <i>E. coli</i>                      |                                                                                                                                                         |           |
| DH5 $\alpha$                        | <i>fhuA2</i> $\Delta$ ( <i>argF-lacZ</i> )U169 <i>phoA glnV44</i> $\Phi$ 80 $\Delta$ ( <i>lacZ</i> )M15<br><i>gyrA96 recA1 relA1 endA1 thi-1 hsdR17</i> | NEB       |
| S17-1                               | <i>thi, pro, hdsR, hdsM+</i> <i>recA</i> , RP4-2 (Tc::Mu Km::Tn7)(4)                                                                                    | (5)       |
| <u>Plasmids</u>                     |                                                                                                                                                         |           |
| pBBP <sub>gdh</sub>                 | Broad-host vector with the <i>Rhodopseudomonas palustris</i> <i>gdh</i> (RPA0944) constitutive promoter; Gm <sup>R</sup>                                | (6)       |
| pUC18T-mini-Tn7T<br>Gm-dsRedExpress | Source of <i>mCherry</i> gene template; Gm <sup>R</sup>                                                                                                 | (7)       |
| pLL1                                | pBBP <sub>gdh</sub> expressing <i>hirR</i> gene plus a P <sub>hirI</sub> - <i>mCherry</i> fusion; PA-HSL bioassay reporter; Gm <sup>R</sup>             | This work |
| pLL2                                | pBBP <sub>gdh</sub> expressing a P <sub>hirI</sub> - <i>mCherry</i> fusion (no <i>hirR</i> ); Gm <sup>R</sup>                                           | This work |
| pHirI                               | pBBP <sub>gdh</sub> expressing <i>hirI</i> ; Gm <sup>R</sup>                                                                                            | This work |
| pMal-t-aiiA                         | AiiA lactonase fused to a maltose-binding protein (MalE)                                                                                                | (8)       |

**Supplemental Table S3. Primers**

---

|                     |                                                                |                                                           |
|---------------------|----------------------------------------------------------------|-----------------------------------------------------------|
| pBBR-hirR-F         | 5'CATATTGTTCCGCATTCATCTGCACCCTCCTCCTCGCT<br>GCAGATGATTTTCAGTTC | vector primer<br>(forward)                                |
| pBBR-mcherry-R      | 5'CGGCGGCATGGACGAGCTGTACAAGTAGGCTGGCGT<br>AATAGCGAAGAGGC       | vector primer<br>(reverse)                                |
| hirR-R              | 5'ACTGAAAATCATCTGCAGCGAGGAGGAGGGTGCAGA<br>TGAATGCGGAACAATATGCG | <i>hirR</i> primer<br>(downstream)                        |
| hirR-F              | 5'CGCCCTTGCTCACCATCTGCACCCTCCTGAGCACCTT<br>CATCTGCACCCTC       | <i>hirR</i> primer<br>(upstream)                          |
| mCherry-R           | 5'GTGCAGATGAAGGTGCTCAGGAGGGTGCAGATGGTG<br>AGCAAGGGCGAGGA       | <i>mCherry</i><br>primer<br>(downstream)                  |
| mCherry-F           | 5'GCGGGCCTCTTCGCTATTACGCCAGCCTACTTGTACA<br>GCTCGTCCATGCC       | <i>mCherry</i><br>primer<br>(upstream)                    |
| pBBR-hirI-F         | 5'TGAGCACCTTCATCTGCACCCTCCTCCTCGCTGCAGA<br>TGATTTTCAGTTC       | For linear<br>pBBPgdh<br>forward<br>primer                |
| pBBR-hirI-R         | 5'ACAATTTTCGCGCTTCTCGGCGCGGTCTGAGAGGCAG<br>ACAAGGTATAGGGC      | For linear<br>pBBPgdh<br>reverse<br>primer                |
| pBBR-<br>mCherry2-F | 5'CAGGCATATCCCGTAGCCCTCAGGGGTTGCCTGCAC<br>CCTCCTCCTCGCTG       | For linear<br>pLL2 (no<br><i>hirR</i> ) forward<br>primer |
| pBBR-<br>mCherry2-R | 5'AAATCATCTGCAGCGAGGAGGAGGGTGCAGGCAACC<br>CCTGAGGGCTACGG       | For linear<br>pLL2 (no<br><i>hirR</i> ) reverse<br>primer |
| hirI-F              | 5'CCGCCTCGCCGCCCTATACCTTGTCTGCCTCTCAGAC<br>CGCGCCGAGAAG        | <i>hirI</i> gene<br>upstream<br>primer                    |
| hirI-R              | 5'CATAGAACTGAAAATCATCTGCAGCGAGGAGGAGGG<br>TGCAGATGAAGGTG       | <i>hirI</i> gene<br>downstream<br>primer                  |

---

## SUPPLEMENTAL LITERATURE CITED

1. Daniel, J. J., Givan, S. A., Brun, Y. V. & Brown, P. J. (2015) Draft genome sequence of *Prosthecomicrobium hirschii* ATCC 27832T. *Genome Announc* 19: 3.
2. Staley, J. T. (1984) *Prosthecomicrobium hirschii*, a new species in a redefined genus. *Intl J Syst Bacteriol* 34: 304-308.
3. Gibson, D. T., Hensley, M., Yoshioka, H. & Mabry, T. J. (1970) Formation of (+)-*cis*-2,3-dihydroxy-1-methylcyclohexa-4,6-diene from toluene by *Pseudomonas putida*. *Biochem* 9: 1626-1630.
4. Luu, R. A., Schneider, B. J., Ho, C. C., Nesteryuk, V., Ngwesse, S. E., Liu, X., Parales, J. V., Ditty, J. L. & Parales, R. E. (2013) Taxis of *Pseudomonas putida* F1 toward phenylacetic acid is mediated by the energy taxis receptor Aer2. *Appl Environ Microbiol* 79: 2416-2423.
5. Simon, R., Priefer, U. & Puhler, A. (1983) A broad host range mobilization system for in vivo genetic engineering: transposon mutagenesis in Gram-negative bacteria. *Nature Biotech* 1: 784-791.
6. McKinlay, J. B. & Harwood, C. S. (2010) Carbon dioxide fixation as a central redox cofactor recycling mechanism in bacteria. *Proc Natl Acad Sci USA* 107: 11669-11675.
7. Choi, K. H. & Schweizer, H. P. (2006) mini-Tn7 insertion in bacteria with single attTn7 sites: example *Pseudomonas aeruginosa*. *Nat Protoc* 1: 153-161.
8. Thomas, P. W. & Fast, W. (2011) Heterologous overexpression, purification, and in vitro characterization of AHL lactonases. *Meth Mol Biol* 692: 275-290.
